# Supplementary material
Source: PubMed Central journal article supplement (PMC10103349)
Supplement: jasn-34-656-s001.pdf [file jasn-34-656-s001.pdf]

## **Supplemental Table of Contents:**

Supplementary Figure 1. Primary outcomes by serum creatinine availability in the cohort

Supplementary Figure 2. Primary outcomes by pre-gestational diabetes and hypertension.

Supplementary Table 1. Checklist of recommendations for reporting of observational studies using the REporting of studies Conducted using Observational Routinely-collected health Data (RECORD) Statement

Supplementary Table 2: Codes used in the study to identify baseline characteristics

Supplementary Table 3: Codes used to identify Severe Maternal Morbidity (SMM) Indicators

Supplementary Table 4: Codes used in the study to identify outcome conditions

Supplementary Table 5: Adjusted Modification of the effect of eGFR categories on the odds of at least one Severe Maternal Morbidity indicator by proteinuria categories

## Supplementary Figure 1. Primary outcomes by serum creatinine availability in the cohort

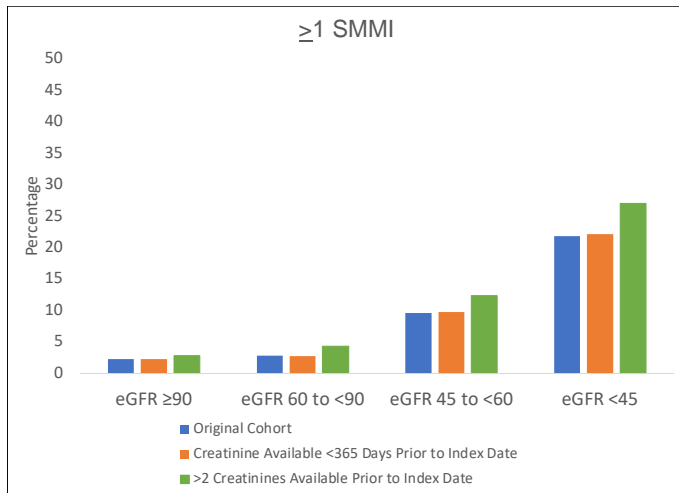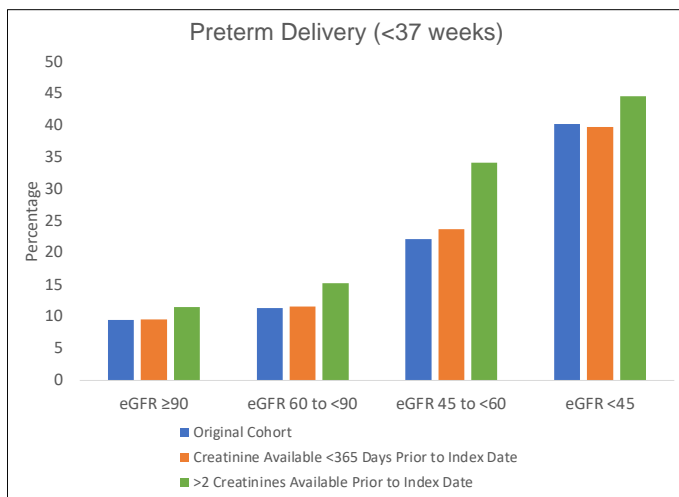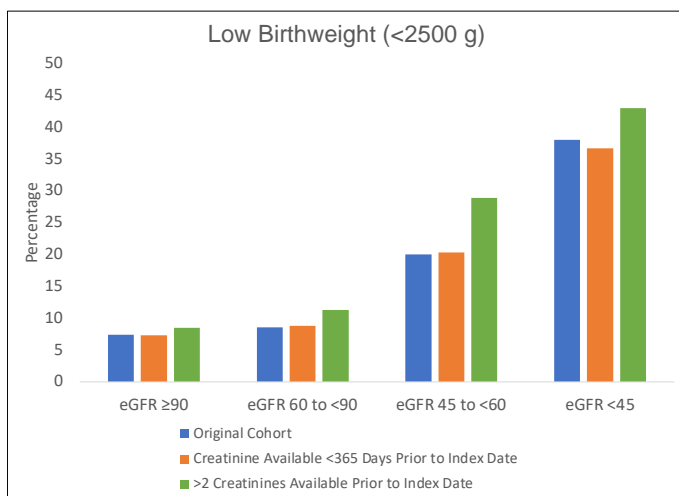

Percentage of each primary outcome ( $\geq 1$  Severe Maternal Morbidity Indicator (SMMI), preterm delivery (<37 weeks gestational age) and low birthweight offspring (<2500 grams) stratified by serum creatinine availability in the cohort. Blue bars represent entire cohort (N=565,907 maternal observations, N=576,814 offspring observations). Orange bars represent cohort with a serum creatinine measured within 365 days of index date (N=419,366 maternal observations, N=427,414 offspring observations). Green bars represent cohort with 2 or more serum creatinine measurements within 2 years of index date (N=108,179 maternal observations, N=110,442 offspring observations).

**Supplementary Figure 2. Primary outcomes by pre-gestational diabetes and hypertension.**

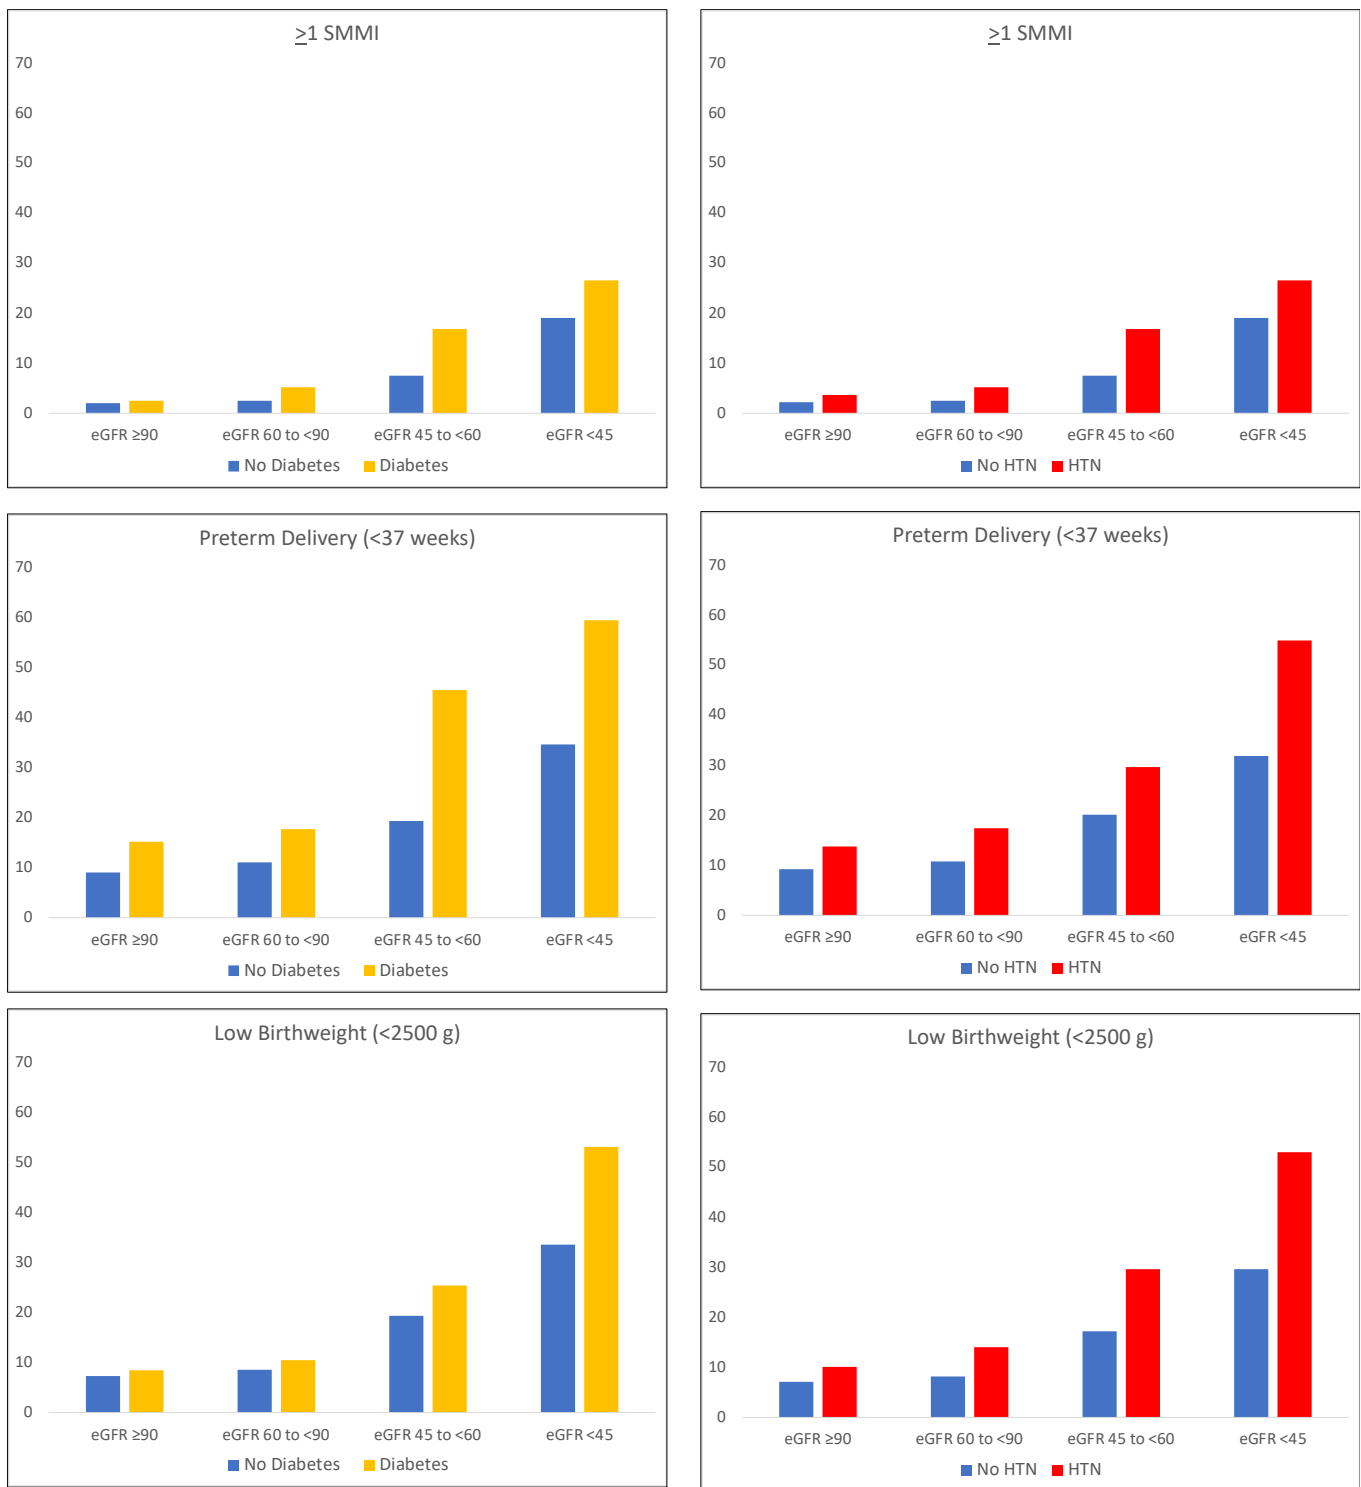

Percentage of each primary outcome ( $\geq 1$  Severe Maternal Morbidity Indicator (SMMI), preterm delivery (<37 weeks gestational age) and low birthweight offspring (<2500 grams) stratified by preconception diabetes diagnoses (top row) and hypertension diagnoses (bottom row). TOP ROW: Blue bars represent cohort with no diabetes diagnoses (N=527,671 maternal observations, N=537,801 offspring observations). Yellow bars represent cohort with diabetes diagnosis (N=38,236 maternal observations, N=39,013 offspring observations). BOTTOM ROW: Blue bars represent cohort with no hypertension diagnoses (N=524,893 maternal observations, N=534,940 offspring observations). Red bars represent cohort with hypertension diagnosis (N=41,014 maternal observations, N=41,874 offspring observations).

**Supplementary Table 1. Checklist of recommendations for reporting of observational studies using the REporting of studies Conducted using Observational Routinely-collected health Data (RECORD) Statement**

|                           | Item No | STROBE items                                                                                                                                                                                        | RECORD items                                                                                                                                                                                                                                                                                                                                                                                                               | Reported              |
|---------------------------|---------|-----------------------------------------------------------------------------------------------------------------------------------------------------------------------------------------------------|----------------------------------------------------------------------------------------------------------------------------------------------------------------------------------------------------------------------------------------------------------------------------------------------------------------------------------------------------------------------------------------------------------------------------|-----------------------|
| <b>Title and abstract</b> | 1       | (a) Indicate the study's design with a commonly used term in the title or the abstract.<br><br>(b) Provide in the abstract an informative and balanced summary of what was done and what was found. | (1.1) The type of data used should be specified in the title or abstract. When possible, the name of the databases used should be included.<br><br>(1.2) If applicable, the geographic region and time frame within which the study took place should be reported in the title or abstract.<br><br>(1.3) If linkage between databases was conducted for the study, this should be clearly stated in the title or abstract. | Abstract              |
| <b>INTRODUCTION</b>       |         |                                                                                                                                                                                                     |                                                                                                                                                                                                                                                                                                                                                                                                                            |                       |
| Background/<br>rationale  | 2       | Explain the scientific background and rationale for the investigation being reported.                                                                                                               |                                                                                                                                                                                                                                                                                                                                                                                                                            | Introduction          |
| Objectives                | 3       | State specific objectives, including any prespecified hypotheses.                                                                                                                                   |                                                                                                                                                                                                                                                                                                                                                                                                                            | Introduction          |
| <b>METHODS</b>            |         |                                                                                                                                                                                                     |                                                                                                                                                                                                                                                                                                                                                                                                                            |                       |
| Study design              | 4       | Present key elements of study design early in the paper.                                                                                                                                            |                                                                                                                                                                                                                                                                                                                                                                                                                            | Methods: Study Design |
| Setting                   | 5       | Describe the setting, locations, and relevant dates, including periods of recruitment, exposure, follow-up, and data collection.                                                                    |                                                                                                                                                                                                                                                                                                                                                                                                                            | Methods: Study Design |
| Participants              | 6       | (a) Give the eligibility criteria, and the sources and methods of selection of                                                                                                                      | (6.1) The methods of study population selection (such as codes or algorithms used to identify subjects) should be listed in detail. If this is not possible, an explanation should be provided.                                                                                                                                                                                                                            | Methods: Population   |

|                              |    |                                                                                                                                                                                       |                                                                                                                                                                                                                                                                                                                                                                                                                                                                             |                                                                 |
|------------------------------|----|---------------------------------------------------------------------------------------------------------------------------------------------------------------------------------------|-----------------------------------------------------------------------------------------------------------------------------------------------------------------------------------------------------------------------------------------------------------------------------------------------------------------------------------------------------------------------------------------------------------------------------------------------------------------------------|-----------------------------------------------------------------|
|                              |    | <p>participants. Describe methods of follow-up.</p> <p>(b) For matched studies, give matching criteria and number of exposed and unexposed.</p>                                       | <p>(6.2) Any validation studies of the codes or algorithms used to select the population should be referenced. If validation was conducted for this study and not published elsewhere, detailed methods and results should be provided.</p> <p>(6.3) If the study involved linkage of databases, consider use of a flow diagram or other graphical display to demonstrate the data linkage process, including the number of individuals with linked data at each stage.</p> |                                                                 |
| Variables                    | 7  | Clearly define all outcomes, exposures, predictors, potential confounders, and effect modifiers. Give diagnostic criteria, if applicable.                                             | (7.1) A complete list of codes and algorithms used to classify exposures, outcomes, confounders, and effect modifiers should be provided. If these cannot be reported, an explanation should be provided.                                                                                                                                                                                                                                                                   | Methods: Study Exposures, Maternal Outcomes, and Fetal Outcomes |
| Data sources/<br>measurement | 8  | For each variable of interest, give sources of data and details of methods of assessment (measurement). Describe comparability of assessment methods if there is more than one group. |                                                                                                                                                                                                                                                                                                                                                                                                                                                                             | Methods: Data Sources<br>Supplemental Tables 2-3                |
| Bias                         | 9  | Describe any efforts to address potential sources of bias.                                                                                                                            |                                                                                                                                                                                                                                                                                                                                                                                                                                                                             | Methods: Statistical analyses                                   |
| Study size                   | 10 | Explain how the study size was arrived at.                                                                                                                                            |                                                                                                                                                                                                                                                                                                                                                                                                                                                                             | Methods: Population<br>Figure 1                                 |
| Quantitative variables       | 11 | Explain how quantitative variables were handled in the analyses. If applicable, describe which groupings were chosen and why.                                                         |                                                                                                                                                                                                                                                                                                                                                                                                                                                                             | Methods: Statistical Analyses                                   |
| Statistical methods          | 12 | <p>(a) Describe all statistical methods, including those used to control for confounding.</p> <p>(b) Describe any methods used to examine subgroups and interactions.</p>             |                                                                                                                                                                                                                                                                                                                                                                                                                                                                             | Methods: Statistical Analyses                                   |

|                                  |     |                                                                                                                                                                                                                                                                                                                      |                                                                                                                                                                                                                                                                                                                                                                       |
|----------------------------------|-----|----------------------------------------------------------------------------------------------------------------------------------------------------------------------------------------------------------------------------------------------------------------------------------------------------------------------|-----------------------------------------------------------------------------------------------------------------------------------------------------------------------------------------------------------------------------------------------------------------------------------------------------------------------------------------------------------------------|
|                                  |     | <p>(c) Explain how missing data were addressed.</p> <p>(d) If applicable, explain how loss to follow-up was addressed.</p> <p>(e) Describe any sensitivity analyses.</p>                                                                                                                                             |                                                                                                                                                                                                                                                                                                                                                                       |
| Data access and cleaning methods | N/A | <p>(12.1) Authors should describe the extent to which the investigators had access to the database population used to create the study population.</p> <p>(12.2) Authors should provide information on the data cleaning methods used in the study.</p>                                                              | <p>Methods: Data Sources</p> <p>Data Access/Access to Data Analysis Protocol</p>                                                                                                                                                                                                                                                                                      |
| Linkage                          | N/A | <p>(12.3) State whether the study included person-level, institutional-level, or other data linkage across two or more databases. The methods of linkage and methods of linkage quality evaluation should be provided.</p>                                                                                           | <p>Methods: Data Sources</p>                                                                                                                                                                                                                                                                                                                                          |
| <b>RESULTS</b>                   |     |                                                                                                                                                                                                                                                                                                                      |                                                                                                                                                                                                                                                                                                                                                                       |
| Participants                     | 13  | <p>(a) Report numbers of individuals at each stage of study--e.g. numbers potentially eligible, examined for eligibility, confirmed eligible, included in the study, completing follow-up, and analyzed.</p> <p>(b) Give reasons for non-participation at each stage.</p> <p>(c) Consider use of a flow diagram.</p> | <p>(13.1) Describe in detail the selection of the persons included in the study (i.e., study population selection), including filtering based on data quality, data availability, and linkage. The selection of included persons can be described in the text and/or by means of the study flow diagram.</p> <p>Results: Baseline Characteristics</p> <p>Figure 1</p> |
| Descriptive data                 | 14  | <p>(a) Give characteristics of study participants (e.g. demographic, clinical, social) and information on exposures and potential confounders.</p> <p>(b) Indicate number of participants with missing data for each variable of interest.</p>                                                                       | <p>Results: Baseline Characteristics</p> <p>Table 1</p>                                                                                                                                                                                                                                                                                                               |

|                |    |                                                                                                                                                                                                                                                                                                                                                                                                                                  |                                                                                                                                                            |
|----------------|----|----------------------------------------------------------------------------------------------------------------------------------------------------------------------------------------------------------------------------------------------------------------------------------------------------------------------------------------------------------------------------------------------------------------------------------|------------------------------------------------------------------------------------------------------------------------------------------------------------|
|                |    | (c) Summarize follow-up time (e.g. average and total amount).                                                                                                                                                                                                                                                                                                                                                                    |                                                                                                                                                            |
| Outcome data   | 15 | Report numbers of outcome events or summary measures over time.                                                                                                                                                                                                                                                                                                                                                                  | Results: Maternal Outcomes and Fetal Outcomes                                                                                                              |
| Main results   | 16 | <p>(a) Give unadjusted estimates and, if applicable, confounder-adjusted estimates and their precision (e.g. 95% confidence interval). Make clear which confounders were adjusted for and why they were included.</p> <p>(b) Report category boundaries when continuous variables were categorized.</p> <p>(c) If relevant, consider translating estimates of relative risk into absolute risk for a meaningful time period.</p> | Results: Maternal Outcomes and Fetal Outcomes                                                                                                              |
| Other analyses | 17 | Report other analyses done (e.g. analyses of subgroups and interactions, and sensitivity analyses).                                                                                                                                                                                                                                                                                                                              | <p>Results: Maternal Outcomes, Fetal Outcomes, Proteinuria Outcomes by eGFR and Proteinuria Severity</p> <p>Figures 2-5</p> <p>Supplemental Tables 5-7</p> |
| Key results    | 18 | Summarize key results with reference to study objectives.                                                                                                                                                                                                                                                                                                                                                                        | Discussion                                                                                                                                                 |
| Limitations    | 19 | Discuss limitations of the study, taking into account sources of potential bias or imprecision. Discuss both direction and magnitude of any potential bias.                                                                                                                                                                                                                                                                      | Discussion                                                                                                                                                 |
|                |    | (19.1) Discuss the implications of using data that were not created or collected to answer the specific research question(s). Include discussion of misclassification bias, unmeasured confounding, missing data, and changing eligibility over time, as they pertain to the study being reported.                                                                                                                               |                                                                                                                                                            |

|                                                           |     |                                                                                                                                                                             |                                              |
|-----------------------------------------------------------|-----|-----------------------------------------------------------------------------------------------------------------------------------------------------------------------------|----------------------------------------------|
| Interpretation                                            | 20  | Give a cautious overall interpretation of results considering objectives, limitations, multiplicity of analyses, results from similar studies, and other relevant evidence. | Discussion                                   |
| Generalizability                                          | 21  | Discuss the generalizability (external validity) of the study results.                                                                                                      | Discussion                                   |
| <b>OTHER INFORMATION</b>                                  |     |                                                                                                                                                                             |                                              |
| Funding                                                   | 22  | Give the source of funding and the role of the funders for the present study and, if applicable, for the original study on which the present article is based.              | Funding                                      |
| Accessibility of protocol, raw data, and programming code | N/A | (22.1) Authors should provide information on how to access any supplemental information such as the study protocol, raw data, or programming code.                          | Data access/access to data analysis protocol |



**Supplementary Table 2: Codes used in the study to identify baseline characteristics**

| Source                        | Variable        | Codes                                                                                                                                                                                                                                                                                                                                                           |
|-------------------------------|-----------------|-----------------------------------------------------------------------------------------------------------------------------------------------------------------------------------------------------------------------------------------------------------------------------------------------------------------------------------------------------------------|
| <b>Age</b>                    |                 |                                                                                                                                                                                                                                                                                                                                                                 |
| RPDB                          | BDATE           |                                                                                                                                                                                                                                                                                                                                                                 |
| <b>Income Quintile</b>        |                 |                                                                                                                                                                                                                                                                                                                                                                 |
| RPDB                          | INCQUINT        | %getdemo ICES macro                                                                                                                                                                                                                                                                                                                                             |
| <b>Rural Residence</b>        |                 |                                                                                                                                                                                                                                                                                                                                                                 |
| RPDB                          | RURAL           | %getdemo ICES macro                                                                                                                                                                                                                                                                                                                                             |
| <b>Nulliparous</b>            |                 |                                                                                                                                                                                                                                                                                                                                                                 |
| MOMBABY                       | B_MULTIBIRTH    | “T”                                                                                                                                                                                                                                                                                                                                                             |
|                               | M_MULTIBIRTH    | “T”                                                                                                                                                                                                                                                                                                                                                             |
| <b>Multiple Gestation</b>     |                 |                                                                                                                                                                                                                                                                                                                                                                 |
| MOMBABY                       | M_IKN           |                                                                                                                                                                                                                                                                                                                                                                 |
|                               | B_DATE          |                                                                                                                                                                                                                                                                                                                                                                 |
| <b>Diabetes</b>               |                 |                                                                                                                                                                                                                                                                                                                                                                 |
| CIHI-DAD                      | ICD-9           | "250"                                                                                                                                                                                                                                                                                                                                                           |
|                               | ICD-10          | "E10", "E11", "E13", "E14"                                                                                                                                                                                                                                                                                                                                      |
| OHIP                          | Diagnostic code | "250"                                                                                                                                                                                                                                                                                                                                                           |
|                               | Fee code        | "K045", "K046", "K029", "K030", "Q040"                                                                                                                                                                                                                                                                                                                          |
| <b>Myocardial Infarction</b>  |                 |                                                                                                                                                                                                                                                                                                                                                                 |
| CIHI-DAD                      | ICD-9           | "410"                                                                                                                                                                                                                                                                                                                                                           |
|                               | ICD-10          | "I21", "I22"                                                                                                                                                                                                                                                                                                                                                    |
| <b>Hypertension</b>           |                 |                                                                                                                                                                                                                                                                                                                                                                 |
| CIHI-DAD                      | ICD-9           | "401", "402", "403", "404", "405"                                                                                                                                                                                                                                                                                                                               |
|                               | ICD-10          | "I10", "I11", "i12", "I13", "I15"                                                                                                                                                                                                                                                                                                                               |
| OHIP                          | Diagnostic code | "401", "402", "403"                                                                                                                                                                                                                                                                                                                                             |
| <b>Family Physician Visit</b> |                 |                                                                                                                                                                                                                                                                                                                                                                 |
| IPDB                          | Main Specialty  | “GP/FP”                                                                                                                                                                                                                                                                                                                                                         |
| OHIP                          | SERVDATE        |                                                                                                                                                                                                                                                                                                                                                                 |
| <b>Nephrologist Visit</b>     |                 |                                                                                                                                                                                                                                                                                                                                                                 |
| IPDB                          | Main Specialty  | “NEPHROLOGY”                                                                                                                                                                                                                                                                                                                                                    |
| OHIP                          | Fee code        | "A160", "A161", "A163", "A164", "A165", "A166", "A168", "A865", "C160", "C161", "C162", "C163", "C164", "C165", "C166", "C167", "C169", "C865", "W165", "W160", "W865", "W166", "W862", "W864", "W867", "W869", "W164", "W162", "W161", "W163", "W168", "A130", "A131", "A133", "A134", "A135", "A136", "A138", "A435", "C121", "C122", "C123", "C124", "C130", |

|  |  |                                                                                                                                                                                                                                                      |
|--|--|------------------------------------------------------------------------------------------------------------------------------------------------------------------------------------------------------------------------------------------------------|
|  |  | "C131", "C132", "C133", "C134", "C135", "C136", "C137", "C138", "C139", "C142", "C143",<br>"C168", "C435", "C982", "W121", "W130", "W131", "W132", "W133", "W134", "W138", "W232",<br>"W234", "W235", "W236", "W237", "W239", "W435", "W972", "W982" |
|--|--|------------------------------------------------------------------------------------------------------------------------------------------------------------------------------------------------------------------------------------------------------|

**Supplementary Table 3: Codes used to identify Severe Maternal Morbidity (SMM) Indicators**

| <b>SMM Indicator</b>                                                                                            | <b>Source</b> | <b>Codes</b>                                                                                                                                                                                                                                                                             |
|-----------------------------------------------------------------------------------------------------------------|---------------|------------------------------------------------------------------------------------------------------------------------------------------------------------------------------------------------------------------------------------------------------------------------------------------|
| Severe preeclampsia and HELLP syndrome                                                                          | CIHI-DAD/SDS  | ICD-10: "O141", "O142"                                                                                                                                                                                                                                                                   |
| Eclampsia                                                                                                       | CIHI-DAD/SDS  | ICD-10: "O15"                                                                                                                                                                                                                                                                            |
| Cerebral venous thrombosis in pregnancy or in the puerperium                                                    | CIHI-DAD/SDS  | ICD-10: "O225", "O873"                                                                                                                                                                                                                                                                   |
| Acute fatty liver with transfusion                                                                              | CIHI-DAD/SDS  | ICD -10: "O266" + [BTREDBC]="1"<br><br>OR<br><br>ICD-10: "O266: + [BTPLASMA]="1"                                                                                                                                                                                                         |
| Pulmonary, cardiac, and CNS complications of anesthesia during pregnancy, the puerperium, or labor and delivery | CIHI-DAD/SDS  | ICD-10: "O290", "O291", "O292", "O890", "O891", "O892", "O740", "O741", "O742", "O743"                                                                                                                                                                                                   |
| Placenta previa with hemorrhage                                                                                 | CIHI-DAD/SDS  | ICD-10: "O441" + [BTREDBC]="1"                                                                                                                                                                                                                                                           |
| Placental abruption with coagulation defect                                                                     | CIHI-DAD/SDS  | ICD-10: "O450"                                                                                                                                                                                                                                                                           |
| Antepartum hemorrhage with coagulation defect                                                                   | CIHI-DAD/SDS  | ICD-10: "O460"                                                                                                                                                                                                                                                                           |
| Intrapartum Hemorrhage with coagulation defect                                                                  | CIHI-DAD/SDS  | ICD-10: "O670"                                                                                                                                                                                                                                                                           |
| Intrapartum Hemorrhage with RBC transfusion                                                                     | CIHI-DAD/SDS  | ICD-10: "O67" + [BTREDBC]="1"                                                                                                                                                                                                                                                            |
| Rupture of the uterus with RBC transfusion, procedures to the uterus or hysterectomy (uterine rupture with RBC) | CIHI-DAD/SDS  | ICD10: "O710", "O711" + any of the following: <ul style="list-style-type: none"> <li>• [BTREDBC]="1"</li> <li>• CCI: "1RM13", "1KT51", "5PC91LA", "5PC91HV" + [BTREDBC]="1"</li> <li>• CCI: "5MD60RC", "5MD60RD", "5MD60KE", "5MD60CB", "1RM89LA"</li> <li>• CCI: "1RM87LAGX"</li> </ul> |

|                                                                                      |              |                                                                                                                                                                                                                                                                             |
|--------------------------------------------------------------------------------------|--------------|-----------------------------------------------------------------------------------------------------------------------------------------------------------------------------------------------------------------------------------------------------------------------------|
|                                                                                      |              | Note: CCI code "1RM89LA" is only included if codes "1PL74", "1RS74", or "1RS80" are NOT also present                                                                                                                                                                        |
| Postpartum hemorrhage with RBC transfusion, procedures to the uterus or hysterectomy | CIHI-DAD/SDS | ICD-10: "O72" + any of the following: <ul style="list-style-type: none"> <li>• [BTREDBC]="1"</li> <li>• CCI: "1RM13", "1KT51", "5PC91LA", "5PC91HV" + CIHI- 1"</li> <li>• CCI: "5MD60RC", "5MD60RD", "5MD60KE", "5MD60CB", "1RM89LA"</li> <li>• CCI: "1RM87LAGX"</li> </ul> |
| Cardiac conditions                                                                   | CIHI-DAD/SDS | Note: CCI code "1RM89LA" is only included if codes "1PL74", "1RS74", or "1RS80" are NOT also present<br>ICD-10: "O742", "O891", "O903", "I21", "I22", "I42", "I43", "I46", "I490", "I50", "J81"<br>CCI: "1HZ09", "1HZ30"                                                    |
| Obstetric Shock                                                                      | CIHI-DAD/SDS | ICD-10: "O751", "R57", "T805", "T886"                                                                                                                                                                                                                                       |
| Septicemia during labour                                                             | CIHI-DAD/SDS | ICD-10:"O753"                                                                                                                                                                                                                                                               |
| Complication of obstetric surgery/ procedure                                         | CIHI-DAD/SDS | ICD-10: "O754"                                                                                                                                                                                                                                                              |
| Puerperal sepsis                                                                     | CIHI-DAD/SDS | ICD-10: "085"                                                                                                                                                                                                                                                               |
| Obstetric embolism                                                                   | CIHI-DAD/SDS | ICD- 10: "O88"                                                                                                                                                                                                                                                              |
| Acute renal failure                                                                  | CIHI-DAD/SDS | ICD-10: "O904", "N17", "N19", "N990"                                                                                                                                                                                                                                        |
| Disseminated intravascular coagulation                                               | CIHI-DAD/SDS | ICD-10: "D65"                                                                                                                                                                                                                                                               |
| Sickle cell anemia with crisis                                                       | CIHI-DAD/SDS | ICD-10: "D570"                                                                                                                                                                                                                                                              |
| Acute psychosis                                                                      | CIHI-DAD/SDS | ICD-10: "F531" ,"F23"                                                                                                                                                                                                                                                       |
| Status epilepticus                                                                   | CIHI-DAD/SDS | ICD-10: "G41"                                                                                                                                                                                                                                                               |
| Cerebral edema or coma                                                               | CIHI-DAD/SDS | ICD-10: "G936", "R402"                                                                                                                                                                                                                                                      |

|                                                                                                 |              |                                                                                                                                                                 |
|-------------------------------------------------------------------------------------------------|--------------|-----------------------------------------------------------------------------------------------------------------------------------------------------------------|
| Cerebrovascular diseases: subarachnoid and intracranial hemorrhage, cerebral infarction, stroke | CIHI-DAD/SDS | ICD-10: "I60", "I61", "I62", "I63", "I64"                                                                                                                       |
| Status asthmaticus:                                                                             | CIHI-DAD/SDS | ICD-10: "J4501", "J4511", "J4581", "J4591"                                                                                                                      |
| Adult respiratory distress syndrome                                                             | CIHI-DAD/SDS | ICD-10: "J80"                                                                                                                                                   |
| Acute abdomen                                                                                   | CIHI-DAD/SDS | ICD-10: "K35", "K37", "K65", "N733", "N73"                                                                                                                      |
| Hepatic failure                                                                                 | CIHI-DAD/SDS | ICD-10: "K71", "K72"                                                                                                                                            |
| Assisted ventilation through endotracheal tube (invasive ventilation)                           | CIHI-DAD/SDS | CCI: "1GZ31CAND"                                                                                                                                                |
| Assisted ventilation through tracheostomy                                                       | CIHI-DAD/SDS | CCI: "1GZ31CRND"                                                                                                                                                |
| Hysterectomy                                                                                    | CIHI-DAD/SDS | CCI: "5MD60RC", "5MD60RD", "5MD60KE", "5MD60CB", "1RM87LAGX", "1RM89LA"<br><br>Note: for CCI: "1RM89LA", exclude if CCI: "1PL74", "1RS74", "1RS80" also present |
| Dialysis                                                                                        | CIHI-DAD/SDS | CCI: "1PZ21"                                                                                                                                                    |
| Evacuation of incisional hematoma with transfusion                                              | CIHI-DAD/SDS | CCI: "5PC73JS" + [BTREDBC] = "1"                                                                                                                                |
| Repair of bladder, urethra, or intestine                                                        | CIHI-DAD/SDS | CCI: "5PC80JR", "1NK80", "1NM80"                                                                                                                                |
| Procedures to the uterus/pelvic vessels with RBC transfusion                                    | CIHI-DAD/SDS | CCI: "1RM13", "1KT51", "5PC91LA", "5PC91HV" + [BTREDBC] = "1"                                                                                                   |
| Surgical or manual correction of inverted uterus for vaginal births only:                       | CIHI-DAD/SDS | CCI: "5PC91HQ", "5PC91HP"<br><br>Note: above codes restricted to vaginal births (i.e., absence of caesarean CCI: "5MD60")                                       |
| Maternal ICU admission                                                                          | CIHI-DAD/SDS | [SCU]: "10", "20", "25", "30", "35", "40", "45", "60", "80"                                                                                                     |
| Reclosure of caesarean wound                                                                    | CIHI-DAD/SDS | CCI: "5PC80JM", "5PC80JH" + [BTREDBC] = "1"                                                                                                                     |

|                                                           |              |                                                        |
|-----------------------------------------------------------|--------------|--------------------------------------------------------|
| Curettage with RBC transfusion                            | CIHI-DAD/SDS | CCI: "5PC91GA", "5PC91GC", "5PC91GD" + [BTREDBC] = "1" |
| <b>Additional Mortality Indicators</b>                    |              |                                                        |
| Death, obstetric, cause unspecified                       | CIHI-DAD/SDS | ICD-10: "O95"                                          |
| Death, obstetric, after 42 days but 1 year after delivery | CIHI-DAD/SDS | ICD-10: "O96"                                          |
| Death from sequelae of direct obstetric causes            | CIHI-DAD/SDS | ICD-10: "O97"                                          |
| Sudden death, death from unspecified cause                | CIHI-DAD/SDS | ICD-10: "R96", "R97", "R98", "R99"                     |

**Supplementary Table 4: Codes used in the study to identify outcome conditions**

| Source                                     | Variable        | Codes                                                                  |
|--------------------------------------------|-----------------|------------------------------------------------------------------------|
| <b>Pre-term Delivery</b>                   |                 |                                                                        |
| MOMBABY                                    | B GESTWKS DEL   |                                                                        |
|                                            | M GESTWKS DEL   |                                                                        |
| <b>Low Birthweight</b>                     |                 |                                                                        |
| CIHI-DAD                                   | WEIGHT          |                                                                        |
| <b>Maternal Death</b>                      |                 |                                                                        |
| RPDB                                       | DTHDATE         |                                                                        |
| <b>Admission to ICU</b>                    |                 |                                                                        |
| CIHI-DAD                                   | CCI             | "1GZ31CAND", "1GZCRND", "1GZ31GPND"                                    |
|                                            | SCU             | "10", "20", "25", "30", "40", "45", "60", "80", "90", "95"             |
| OHIP                                       | Fee code        | "G557", "G558", "G559", "G400", "G401", "G402", "G405", "G406", "G407" |
| <b>Gestational Hypertension</b>            |                 |                                                                        |
| CIHI-DAD                                   | ICD-10          | "O13", "O16"                                                           |
| <b>Pre-eclampsia</b>                       |                 |                                                                        |
| CIHI-DAD                                   | ICD-10          | "O11", "O14", "O15"                                                    |
| OHIP                                       | Diagnostic code | "642"                                                                  |
| <b>Post-partum Hemorrhage</b>              |                 |                                                                        |
| CIHI-DAD                                   | ICD-10          | "O72"                                                                  |
| <b>Acute Renal Failure (SMM indicator)</b> |                 |                                                                        |
| CIHI-DAD/SDS                               | ICD-10          | "O904", "N17", "N19", "N990"                                           |
| <b>Dialysis (SMM indicator)</b>            |                 |                                                                        |
| CIHI-DAD/SDS                               | ICD-10          | CCI: "1PZ21"                                                           |
| <b>NICU Admission</b>                      |                 |                                                                        |
| CIHI-DAD                                   | CCI             | "1GZ31CAND", "1GZCRND", "1GZ31GPND"                                    |
|                                            | SCU             | "50"                                                                   |
| OHIP                                       | Fee code        | "G557", "G558", "G559", "G400", "G401", "G402", "G405", "G406", "G407" |
| <b>Stillbirth</b>                          |                 |                                                                        |
| MOMBABY                                    | B STILLBIRTH    | "T"                                                                    |
|                                            | M STILLBIRTH    | "T"                                                                    |
| <b>Neonatal Death</b>                      |                 |                                                                        |
| RPDB                                       | DTHDATE         |                                                                        |

**Supplementary Table 5: Adjusted Modification of the effect of eGFR categories on the odds of at least one Severe Maternal Morbidity indicator by proteinuria categories**

| eGFR<br>(ml/min/1.73m <sup>2</sup> ) | Proteinuria<br>category | Expected<br>Effect <sup>1</sup><br>(Odds Ratio) | Multiplicative Interaction <sup>2</sup>                    |                      | Additive Interaction <sup>2</sup>                                         |                     |
|--------------------------------------|-------------------------|-------------------------------------------------|------------------------------------------------------------|----------------------|---------------------------------------------------------------------------|---------------------|
|                                      |                         |                                                 | Multiplicative<br>Interaction <sup>1</sup><br>(Odds Ratio) | p-value <sup>4</sup> | Relative excess risk<br>due to interaction <sup>1,3</sup><br>(Odds Ratio) | 95% CI <sup>4</sup> |
| 60 to < 90                           | Moderate                | 1.63                                            | 1.30                                                       | 0.008                | 0.39                                                                      | 0.11 to 0.67        |
| 45 to <60                            | Moderate                | 2.32                                            | 0.70                                                       | 0.512                | -0.73                                                                     | -3.41 to 1.95       |
| < 45                                 | Moderate                | 8.21                                            | 5.08                                                       | 0.128                | 6.65                                                                      | -1.12 to 14.36      |
| 60 to < 90                           | Severe                  | 1.70                                            | 0.96                                                       | 0.847                | -0.01                                                                     | -0.70 to 0.68       |
| 45 to <60                            | Severe                  | 13.61                                           | 2.92                                                       | 0.011                | 10.10                                                                     | 2.20 to 18.00       |
| < 45                                 | Severe                  | 19.42                                           | 8.54                                                       | 0.035                | 17.39                                                                     | 5.12 to 29.67       |

<sup>1</sup>We reported the resulting estimates assuming an independent working correlation. We also estimated the correlation to be 0.04 using an exchangeable working correlation. Models were adjusted for age, baseline diabetes, baseline hypertension, nulliparous status, and multiple gestation.

<sup>2</sup>Interpretation of Interaction Measures. *Multiplicative Interaction*: If the expected joint effect of the exposure is equivalent to their observed effect, they act multiplicatively; If the observed joint effect is > than then expected effect, then it is a super-multiplicative interaction; If the observed joint effect is < than then expected effect, then it is a sub-multiplicative interaction. *Relative excess risk due to interaction (RERI)*: RERI=0 indicates no interaction; RERI> 0 indicates super-additive interaction; RERI < 0 indicates sub- additive interaction. Preserved kidney function (eGFR ≥90 ml/min/1.73 m<sup>2</sup>) and normal/mild proteinuria (ACR value < 3 mg/mmol or PCR value < 15 mg/mmol or urine dipstick normal) served as the referent categories.

<sup>3</sup> z-scores for the RERI p-values were calculated by dividing the RERI by the robust standard error obtained from a GEE model.

<sup>4</sup> p-values and 95% CI widths were not adjusted for multiple testing. Robust standard errors from a GEE model were used for inferences to adjust for the correlation of pregnancies within the same mother.



**Supplementary Table 6: Adjusted Modification of the effect of eGFR categories on the odds of pre-term birth by proteinuria categories**

| eGFR<br>(ml/min/1.73m <sup>2</sup> ) | Proteinuria<br>category | Expected<br>Effect <sup>1</sup><br>(Odds Ratio) | Multiplicative Interaction <sup>2</sup>                    |                      | Additive Interaction <sup>2</sup>                                         |                     |
|--------------------------------------|-------------------------|-------------------------------------------------|------------------------------------------------------------|----------------------|---------------------------------------------------------------------------|---------------------|
|                                      |                         |                                                 | Multiplicative<br>Interaction <sup>1</sup><br>(Odds Ratio) | p-value <sup>4</sup> | Relative excess risk<br>due to interaction <sup>1,3</sup><br>(Odds Ratio) | 95% CI <sup>4</sup> |
| 60 to < 90                           | Moderate                | 1.43                                            | 1.10                                                       | 0.108                | 0.15                                                                      | -0.01 to 0.30       |
| 45 to <60                            | Moderate                | 3.14                                            | 1.48                                                       | 0.241                | 1.14                                                                      | -0.65 to 2.92       |
| < 45                                 | Moderate                | 5.55                                            | 1.55                                                       | 0.486                | 2.27                                                                      | -2.81 to 7.35       |
| 60 to < 90                           | Severe                  | 2.25                                            | 1.40                                                       | 0.004                | 0.70                                                                      | 0.21 to 1.18        |
| 45 to <60                            | Severe                  | 7.41                                            | 2.81                                                       | 0.002                | 5.13                                                                      | 1.44 to 8.82        |
| < 45                                 | Severe                  | 6.97                                            | 1.57                                                       | 0.459                | 3.41                                                                      | -2.03 to 8.86       |

<sup>1</sup>We reported the resulting estimates assuming an independent working correlation. We also estimated the correlation to be 0.32 using an exchangeable working correlation. Models were adjusted for age, baseline diabetes, baseline hypertension, nulliparous status, and multiple gestation.

<sup>2</sup> Interpretation of Interaction Measures. *Multiplicative Interaction*: If the expected joint effect of the exposure is equivalent to their observed effect, they act multiplicatively; If the observed joint effect is > than then expected effect, then it is a super-multiplicative interaction; If the observed joint effect is < than then expected effect, then it is a sub-multiplicative interaction. *Relative excess risk due to interaction (RERI)*: RERI=0 indicates no interaction; RERI> 0 indicates super-additive interaction; RERI < 0 indicates sub- additive interaction. Preserved kidney function (eGFR ≥90 ml/min/1.73 m<sup>2</sup>) and normal/mild proteinuria (ACR value < 3 mg/mmol or PCR value < 15 mg/mmol or urine dipstick normal) served as the referent categories.

<sup>3</sup> z-scores for the RERI p-values were calculated by dividing the RERI by the robust standard error obtained from a GEE model.

<sup>4</sup> p-values and 95% CIs were not adjusted for multiple testing. Robust standard errors from a GEE model were used for inferences to adjust for the correlation of pregnancies within the same mother.

**Supplementary Table 7: Adjusted Modification of the effect of eGFR categories on the odds of low birthweight by proteinuria categories**

| eGFR<br>(ml/min/1.73m <sup>2</sup> ) | Proteinuria<br>category | Expected<br>Effect <sup>1</sup><br>(Odds Ratio) | Multiplicative Interaction <sup>2</sup>                    |                      | Additive Interaction <sup>2</sup>                                         |                     |
|--------------------------------------|-------------------------|-------------------------------------------------|------------------------------------------------------------|----------------------|---------------------------------------------------------------------------|---------------------|
|                                      |                         |                                                 | Multiplicative<br>Interaction <sup>1</sup><br>(Odds Ratio) | p-value <sup>4</sup> | Relative excess risk<br>due to interaction <sup>1,3</sup><br>(Odds Ratio) | 95% CI <sup>4</sup> |
| 60 to < 90                           | Moderate                | 1.40                                            | 1.12                                                       | 0.092                | 0.17                                                                      | -0.01 to 0.35       |
| 45 to <60                            | Moderate                | 3.26                                            | 1.92                                                       | 0.111                | 1.63                                                                      | -0.57 to 3.83       |
| < 45                                 | Moderate                | 6.20                                            | 1.16                                                       | 0.815                | 1.35                                                                      | -5.01 to 7.71       |
| 60 to < 90                           | Severe                  | 2.19                                            | 1.35                                                       | 0.029                | 0.61                                                                      | 0.06 to 1.16        |
| 45 to <60                            | Severe                  | 12.57                                           | 5.68                                                       | < 0.0001             | 10.59                                                                     | 4.44 to 16.74       |
| < 45                                 | Severe                  | 10.78                                           | 1.54                                                       | 0.471                | 5.58                                                                      | -2.63 to 13.79      |

<sup>1</sup>We reported the resulting estimates assuming an independent working correlation. We also estimated the correlation to be 0.29 using an exchangeable working correlation. Models were adjusted for age, baseline diabetes, baseline hypertension, nulliparous status, and multiple gestation.

<sup>2</sup> Interpretation of Interaction Measures. *Multiplicative Interaction*: If the expected joint effect of the exposure is equivalent to their observed effect, they act multiplicatively; If the observed joint effect is > than then expected effect, then it is a super-multiplicative interaction; If the observed joint effect is < than then expected effect, then it is a sub-multiplicative interaction. *Relative excess risk due to interaction (RERI)*: RERI=0 indicates no interaction; RERI> 0 indicates super-additive interaction; RERI < 0 indicates sub-additive interaction. Preserved kidney function (eGFR ≥90 ml/min/1.73 m<sup>2</sup>) and normal/mild proteinuria (ACR value < 3 mg/mmol or PCR value < 15 mg/mmol or urine dipstick normal) served as the referent categories.

<sup>3</sup> z-scores for the RERI p-values were calculated by dividing the RERI by the robust standard error obtained from a GEE model.

<sup>4</sup> p-values and 95% CIs were not adjusted for multiple testing. Robust standard errors from a GEE model were used for inferences to adjust for the correlation of pregnancies within the same mother.
